# Supplementary material for: Trends in healthcare utilisation during COVID-19: a longitudinal study from the UK
Source: PubMed Central journal article supplement — BMJ Open. 2021 Jul 30;11(7):e048151. doi: 10.1136/bmjopen-2020-048151 (PMC8327639; doi:10.1136/bmjopen-2020-048151), 2021-07-30
Supplement: bmjopen-2020-048151supp001.pdf [file bmjopen-2020-048151supp001.pdf]

Table S1. Frequency of claims by condition data per 1000 enrolled members from 2018 to 2019\* to 2020

| Service                                   | Year | Jan  | Feb  | Mar  | Apr  | May  | Jun  | Jul  | Aug  |
|-------------------------------------------|------|------|------|------|------|------|------|------|------|
| Musculoskeletal system                    | Pre  | 70.8 | 64.6 | 68.6 | 60.9 | 64.8 | 60.2 | 58.3 | 35.8 |
|                                           | Post | 73.4 | 68.2 | 51.8 | 9.4  | 10.4 | 19.4 | 31.9 | 19.0 |
| Symptoms, signs, & ill-defined conditions | Pre  | 23.0 | 21.6 | 23.4 | 22.4 | 23.8 | 24.4 | 27.0 | 16.5 |
|                                           | Post | 38.7 | 34.3 | 27.1 | 6.0  | 6.7  | 10.3 | 15.1 | 8.6  |
| Neoplasms                                 | Pre  | 19.5 | 17.2 | 18.7 | 16.1 | 16.5 | 15.4 | 15.5 | 9.0  |
|                                           | Post | 20.5 | 18.2 | 19.1 | 10.2 | 11.0 | 13.3 | 13.4 | 6.0  |
| Mental disorders                          | Pre  | 14.6 | 12.9 | 14.6 | 12.6 | 13.8 | 10.2 | 7.9  | 3.3  |
|                                           | Post | 18.8 | 18.1 | 19.4 | 16.1 | 10.8 | 10.7 | 9.7  | 4.0  |
| Genitourinary                             | Pre  | 13.8 | 13.0 | 13.9 | 12.4 | 13.1 | 12.2 | 10.9 | 7.3  |
|                                           | Post | 14.7 | 13.7 | 10.8 | 2.6  | 2.9  | 5.3  | 7.7  | 4.6  |
| Injury & poisoning                        | Pre  | 13.5 | 12.2 | 12.9 | 11.7 | 12.4 | 11.1 | 9.8  | 5.7  |
|                                           | Post | 11.2 | 10.8 | 9.7  | 2.2  | 2.1  | 3.8  | 5.8  | 2.6  |
| Digestive                                 | Pre  | 11.7 | 10.1 | 11.2 | 8.8  | 9.7  | 8.9  | 8.5  | 5.3  |
|                                           | Post | 11.1 | 10.4 | 7.4  | 1.1  | 1.3  | 2.4  | 5.2  | 3.5  |
| Nervous system                            | Pre  | 8.9  | 7.8  | 8.7  | 7.7  | 8.9  | 7.6  | 6.4  | 4.0  |
|                                           | Post | 8.8  | 8.1  | 6.0  | 0.8  | 1.1  | 2.3  | 4.3  | 2.2  |
| Circulatory                               | Pre  | 5.4  | 5.0  | 5.0  | 4.5  | 5.3  | 4.9  | 4.0  | 2.3  |
|                                           | Post | 5.2  | 4.8  | 3.6  | 0.6  | 1.0  | 1.7  | 2.0  | 1.0  |
| Skin & subcutaneous                       | Pre  | 5.0  | 4.1  | 4.8  | 4.2  | 4.9  | 4.1  | 4.2  | 2.4  |
|                                           | Post | 4.7  | 4.9  | 4.0  | 1.2  | 1.1  | 1.7  | 2.3  | 1.2  |
| Respiratory                               | Pre  | 4.1  | 3.7  | 3.7  | 3.3  | 3.8  | 3.4  | 3.0  | 1.5  |
|                                           | Post | 4.1  | 3.5  | 2.4  | 0.3  | 0.5  | 0.6  | 1.0  | 0.7  |
| Endocrine, nutritional & metabolic        | Pre  | 1.5  | 1.3  | 1.4  | 1.3  | 1.4  | 1.3  | 1.3  | 0.9  |
|                                           | Post | 1.7  | 1.4  | 1.5  | 0.3  | 0.3  | 0.6  | 0.9  | 0.5  |
| Others                                    | Pre  | 0.8  | 0.5  | 0.7  | 0.5  | 0.6  | 0.8  | 0.7  | 0.4  |
|                                           | Post | 1.0  | 1.1  | 0.8  | 0.2  | 0.2  | 0.5  | 0.6  | 0.4  |
| Pregnancy & childbirth complications      | Pre  | 0.6  | 0.6  | 0.6  | 0.6  | 0.7  | 0.5  | 0.6  | 0.2  |
|                                           | Post | 1.0  | 0.9  | 0.6  | 0.6  | 0.6  | 0.6  | 0.4  | 1.0  |
| Infectious & parasitic                    | Pre  | 0.5  | 0.3  | 0.5  | 0.4  | 0.3  | 0.4  | 0.4  | 0.2  |
|                                           | Post | 0.4  | 0.3  | 0.4  | 0.0  | 0.2  | 0.2  | 0.2  | 0.1  |
| Blood                                     | Pre  | 0.3  | 0.4  | 0.4  | 0.4  | 0.3  | 0.2  | 0.3  | 0.1  |
|                                           | Post | 0.4  | 0.5  | 0.5  | 0.1  | 0.1  | 0.1  | 0.2  | 0.3  |

\*Average for 2018 and 2019

Table S2. Frequency of claims by service data per 1000 enrolled members from 2018 to 2019 to 2020

| Service                    | Year | Jan  | Feb  | Mar  | Apr  | May  | Jun  | Jul  | Aug  |
|----------------------------|------|------|------|------|------|------|------|------|------|
| Specialist Consultations   | Pre  | 40.4 | 36.1 | 39.2 | 35.8 | 37.4 | 36.1 | 34.2 | 20.3 |
|                            | Post | 43.0 | 39.3 | 33.8 | 10.9 | 11.3 | 17.7 | 23.7 | 14.3 |
| Physiotherapy              | Pre  | 39.6 | 37.0 | 40.7 | 36.7 | 38.2 | 34.3 | 34.9 | 21.3 |
|                            | Post | 38.3 | 37.9 | 27.3 | 6.5  | 6.1  | 9.2  | 13.9 | 8.2  |
| Diagnostic                 | Pre  | 34.3 | 31.5 | 33.1 | 29.9 | 32.4 | 31.5 | 34.2 | 23.9 |
|                            | Post | 54.1 | 48.4 | 39.4 | 7.5  | 8.9  | 14.8 | 23.1 | 12.8 |
| Surgeons/Anaesthetist Fees | Pre  | 16.9 | 14.7 | 15.6 | 13.5 | 14.6 | 13.9 | 12.3 | 6.2  |
|                            | Post | 16.0 | 14.1 | 11.2 | 1.2  | 1.3  | 3.1  | 6.9  | 3.5  |
| Psychiatric                | Pre  | 14.6 | 13.0 | 14.7 | 12.6 | 14.6 | 10.1 | 7.9  | 3.2  |
|                            | Post | 18.8 | 18.5 | 19.3 | 16.4 | 10.8 | 10.8 | 9.6  | 4.1  |
| Accommodation/Consumables  | Pre  | 10.2 | 8.6  | 9.1  | 7.4  | 7.9  | 7.6  | 6.6  | 4.1  |
|                            | Post | 8.1  | 7.6  | 6.5  | 1.8  | 2.9  | 2.6  | 3.8  | 1.8  |
| Treatment Room Charges     | Pre  | 7.5  | 6.4  | 6.9  | 5.7  | 6.3  | 6.3  | 5.3  | 3.3  |
|                            | Post | 5.9  | 5.6  | 4.3  | 0.3  | 0.3  | 0.9  | 2.7  | 1.4  |
| Chiro/Osteopathy           | Pre  | 7.2  | 7.1  | 7.8  | 6.9  | 7.4  | 6.4  | 5.2  | 2.6  |
|                            | Post | 7.5  | 6.5  | 4.7  | 0.4  | 1.5  | 3.5  | 4.5  | 1.9  |
| Treatment Room Charges     | Pre  | 5.9  | 5.4  | 5.8  | 5.2  | 6.0  | 5.4  | 5.6  | 3.8  |
|                            | Post | 6.7  | 6.6  | 5.1  | 1.1  | 1.0  | 2.2  | 3.6  | 2.3  |
| Others                     | Pre  | 5.3  | 4.9  | 4.8  | 3.8  | 5.1  | 4.2  | 3.6  | 1.6  |
|                            | Post | 4.9  | 4.6  | 3.8  | 0.7  | 0.8  | 1.5  | 2.5  | 1.1  |
| Package Pricing            | Pre  | 2.8  | 2.6  | 2.7  | 2.4  | 2.6  | 2.4  | 2.5  | 1.5  |
|                            | Post | 3.3  | 2.7  | 2.2  | 0.2  | 0.1  | 0.5  | 1.2  | 0.7  |
| Chemotherapy/Radiotherapy  | Pre  | 2.8  | 2.5  | 2.9  | 2.3  | 2.5  | 2.2  | 2.3  | 1.4  |
|                            | Post | 2.3  | 2.8  | 3.0  | 2.6  | 2.9  | 3.8  | 2.4  | 1.7  |
| Specialist Fees            | Pre  | 2.2  | 1.9  | 2.2  | 2.0  | 2.1  | 1.8  | 1.8  | 1.0  |
|                            | Post | 2.3  | 1.9  | 1.8  | 0.9  | 0.8  | 1.2  | 1.3  | 0.6  |
| GP Consultations           | Pre  | 0.4  | 0.3  | 0.3  | 0.3  | 0.3  | 0.3  | 0.2  | 0.1  |
|                            | Post | 0.4  | 0.4  | 0.3  | 0.1  | 0.1  | 0.1  | 0.1  | 0.0  |

\*Average for 2018 and 2019
